# Supplementary material for: Pattern of Morphological Variability in Unrepaired Unilateral Clefts With and Without Cleft Palate May Suggest Intrinsic Growth Deficiency
Source: Front Cell Dev Biol. 2020 Dec 11;8:587859. doi: 10.3389/fcell.2020.587859 (PMC7759528; doi:10.3389/fcell.2020.587859)
Supplement: Supplementary file 1 [file Table_1.xlsx]

## Sheet: all PCs
Supplementary table 1. Proportion of variance in a sample comprising subjects with (N=243) and without clefts (N=50) described by all principal components (PCs)
Principal component	Variance	% Variance	% Cumulative variance
PC1	1,1778658E-003	21,3%	21,3%
PC2	7,7627682E-004	14,1%	35,4%
PC3	6,5430730E-004	11,8%	47,2%
PC4	4,4630523E-004	8,1%	55,3%
PC5	2,7443751E-004	5,0%	60,3%
PC6	2,7129518E-004	4,9%	65,2%
PC7	2,1206664E-004	3,8%	69,0%
PC8	1,9499203E-004	3,5%	72,6%
PC9	1,6349205E-004	3,0%	75,5%
PC10	1,4312222E-004	2,6%	78,1%
PC11	1,3519663E-004	2,4%	80,6%
PC12	1,2884012E-004	2,3%	82,9%
PC13	1,1838417E-004	2,1%	85,0%
PC14	1,0340846E-004	1,9%	86,9%
PC15	8,9516095E-005	1,6%	88,5%
PC16	8,0996518E-005	1,5%	90,0%
PC17	7,6567280E-005	1,4%	91,4%
PC18	6,3443846E-005	1,1%	92,5%
PC19	6,2376791E-005	1,1%	93,7%
PC20	5,1627130E-005	0,9%	94,6%
PC21	4,8231512E-005	0,9%	95,5%
PC22	4,2182891E-005	0,8%	96,2%
PC23	4,0549737E-005	0,7%	97,0%
PC24	3,8173641E-005	0,7%	97,7%
PC25	3,0949630E-005	0,6%	98,2%
PC26	2,5225347E-005	0,5%	98,7%
PC27	1,9311356E-005	0,3%	99,0%
PC28	1,6483683E-005	0,3%	99,3%
PC29	1,3007954E-005	0,2%	99,6%
PC30	1,1659917E-005	0,2%	99,8%
PC31	7,4895310E-006	0,1%	99,9%
PC32	5,5278073E-006	0,1%	100,0%
PC33	8,8340636E-033	0,0%	100,0%
PC34	8,4539037E-034	0,0%	100,0%
PC35	9,4442566E-035	0,0%	100,0%
PC36	3,3254170E-033	0,0%	100,0%
